# Supplementary material
Source: Elsevier journal article supplement (https://www.sciencedirect.com/science/article/pii/S0213911122000012)
Supplement: mmc1 [file S0213911122000012:mmc1.docx]

ANEXO 1. Guía a la entrevista telefónica a pacientes.

**Consideraciones iniciales:**

- Presentación de la entrevistadora y del objetivo de la investigación

Ejemplo:

Buenos días, me llamo X, soy X su médica/enfermera, la que la llamó por teléfono hace unos días des del CAP Y. Estamos realizando un estudio para poder crear conocimiento sobre los casos leves y moderados de COVID19 a través de aquello que nos dicen los pacientes que les sucede, de cómo relatan sus síntomas. El estudio consiste en recopilar información a través de una entrevista telefónica.

- Comprobar que lo entiende, ¿le parece bien? ¿le parece importante? ¿Por qué?
- ¿Entonces ¿Quiere participar? ¿Le parece bien participar? ¿Dispone de unos minutos para participar ahora?
- Recordar antes de empezar: Garantía de confidencialidad y compromiso de devolución. Opción a enviar vía mail información escrita sobre el estudio.
- Rellenar el cuadro con las características del paciente del anexo 4 (“descripción de los informantes”). Apuntar iniciales y su correspondencia con nombre y apellidos, teléfono y dirección si está interesada en devolución de resultados. MUY CONFIDENCIAL: OJO CON LOS CORREOS. HACER LLEGAR A [gemmatorrell@gmail.com](mailto:gemmatorrell@gmail.com)

**Conversación:**

1. **PREGUNTA INICIAL**

Preguntas abiertas que fomenten el relato: “explíqueme cómo empezó todo de la forma más precisa que pueda”.

1. **NARRATIVA ABIERTA**

No interrumpir al paciente hasta que termine su relato.

Escuchar el relato del paciente y detectar los síntomas que va relatando para proceder a su desarrollo en el paso 3.

1. **DESCRIPCIÓN MINUCIOSA SÍNTOMAS**

Una vez haya nombrado en la narrativa abierta los síntomas que ha percibido, ayudarle a realizar una descripción minuciosa de cada uno de ellos con el soporte de las preguntas del anexo 2.

Haz preguntas abiertas. Deja que se explaye en su narrativa de cada síntoma: ¿Cómo es esa sensación? ¿Cómo la describiría? Descríbala minuciosamente, tómese su tiempo.

Utiliza por favor sus mismos términos al transcribir la información, tipo: “sensación de que el aire no llega abajo, que hay un tope cuando cojo aire”.

Recoger, para cada síntoma si recuerda cuando apareció y cuando desapareció o cuantos días duró, aunque sea aproximadamente. ¿Sería capaz de decirme qué síntoma o síntomas presentó primero, cual después, etc y luego decirme cuando desapareció cada uno de ellos?

¿Cuál de todas las sensaciones que me ha contado, ha sido la que le ha preocupado más? ¿Por qué? Anotárlo en observaciones de cada síntoma.

1. **CONSENSUAR LO RECOGIDO**

Confirma con el paciente lo que has apuntado, léele lo que has apuntado: “así que, si no entiendo mal, la tos que ha tenido la describe como: …”

- 1. Si el paciente ratifica que sí, cerramos ese síntoma ahí y continuamos con el siguiente.
  2. Si no está de acuerdo, volvemos a empezar con ese síntoma hasta obtener la conformidad del paciente.
  3. Si quiere añadir algo más a la descripción del síntoma, también puede hacerlo en ese momento.

1. **LISTADO DE SÍNTOMAS**

Una vez se haya consensuado lo recogido con lo percibido por el paciente, preguntar abiertamente por si hay algún síntoma de los que no ha descrito y aparecen en el anexo 2. De esta manera podemos hacer aflorar síntomas que le hayan pasado desapercibidos. Anotar en la última columna Anexo 2 (observaciones) que no han sido nombrados espontáneamente.

Si el paciente nombra síntomas que no están en el listado, anotarlos en el apartado “miscelánea”, al final del cuadro del Anexo 2.

Volver a consensuar lo recogido con el/la paciente.

1. **CIERRE DE LA CONVERSACIÓN**

Preguntar, antes de cerrar la conversación si hay algo más que querría comentar acerca de los síntomas o de la evolución de sus síntomas. Anotarlo en observaciones.

Agradecer de nuevo su participación

Decirle que cuando acabemos el estudio le mandaremos los resultados si está interesado/a. En este caso pedirle dirección.

Despedirse
