# Supplementary material
Source: Elsevier journal article supplement (https://www.sciencedirect.com/science/article/pii/S0213911122000012)
Supplement: mmc2 [file S0213911122000012:mmc2.docx]

ANEXO 2. Tabla de recogida de datos.

| **Síntomas/sensación percibida** | **¿Qué podemos preguntar?** | **Qué dicen los y las pacientes: NARRATIVA DEL PACIENTE** | **Observaciones** |
| --- | --- | --- | --- |
| MOLESTIA EN EL PECHO | ¿Ha tenido? ¿Cómo lo describiría? ¿Dónde y cómo?  ¿Cómo mejora o empeora?:Con el movimiento (hacia delante, estirado, ¿recostado…)? ¿Con la respiración?  ¿En qué postura duerme mejor: ¿boca arriba, boca abajo…?  ¿En qué momento del día empeora/mejora?  ¿Mejora o empeora con el movimiento? ¿Se va a algún sitio?  ¿Algo más?  ¿Cuándo empezó? ¿lo tenía durante todo el día o iba y venía? ¿Apareció de forma súbita o progresiva? |  |  |
| DISCOMFORT/DIFICULTAD RESPIRATORIA | ¿Ha tenido? ¿Cómo lo describiría?  ¿Cuándo ocurre? ¿Puede explicarme un poco más la sensación que tiene al respirar? ¿Tiene la sensación de tener que hacer más respiraciones?  ¿Cuándo mejora? ¿Cuándo empeora? ¿En qué momento del día empeora/mejora? ¿Cuándo empezó? ¿lo tenía durante todo el día o iba y venía? ¿Apareció de forma súbita o progresiva? |  |  |
| FATIGA | ¿Ha tenido? ¿Cómo lo describiría?  ¿Cuándo mejora o empeora?  ¿Con qué mejora o empeora?  ¿En qué momento del día mejora o empeora?  ¿Se cansa al hacer actividades habituales?  ¿Nota que cuando se mueve poco se cansa mucho?  ¿Nota cuando se mueve que el corazón va muy rápido?  ¿Cuándo empezó? ¿lo tenía durante todo el día o iba y venía? ¿Apareció de forma súbita o progresiva? |  |  |
| DOLOR DE CABEZA | ¿Ha tenido? ¿Cómo lo describiría?  ¿Empeora en algún momento del día? ¿Está presente todo el día o hay momentos en los que no lo tiene? ¿Cuándo ocurre eso?  ¿Le parece similar a algún dolor de cabeza que haya padecido? ¿Le dificulta el sueño o la despierta por la noche?  ¿Empeora con el ejercicio?  ¿Mejora con el paracetamol?  ¿Cuándo empezó? ¿lo tenía durante todo el día o iba y venía? ¿Apareció de forma súbita o progresiva? |  |  |
| TOS | ¿Ha tenido? ¿Cómo la describiría?  ¿Saca mucosidad con la tos?  ¿Cuándo empeora?  ¿Mejora con algo?  Oímos que: Entrecorta el habla  ¿Cuándo empezó? ¿lo tenía durante todo el día o iba y venía? ¿Apareció de forma súbita o progresiva? |  |  |
| FIEBRE | ¿Ha tenido? ¿Cómo la describiría?  ¿Cuánta temperatura?  ¿Ha tenido o tiene escalofríos?  ¿Cuándo empezó? ¿Cuándo tiene más fiebre, por la mañana o por la tarde?  ¿mejora con el paracetamol? ¿Cuántos días duró?  ¿Cuándo empezó? ¿lo tenía durante todo el día o iba y venía? ¿Apareció de forma súbita o progresiva? |  |  |
| DIARREA | ¿Ha tenido? ¿Cómo lo describiría?  ¿Había sangre o moco? ¿Con que frecuencia hacía deposiciones? ¿Con qué frecuencia hace usted deposiciones? ¿Era más frecuente que lo habitual? ¿Todas las veces que iba a hacer deposiciones ocurría esto que me cuenta? ¿Cuántos días le ha durado?  ¿Cuándo empezó? ¿Cuándo terminó? |  |  |
| ANOSMIA/DISGEUSIA[[1]](#endnote-1) | ¿Ha tenido? ¿Cómo lo describiría?  ¿Ha dejado de notar el sabor de las comidas o el olor?  ¿Cuándo empezó? ¿Cuándo terminó? |  |  |
| NAUSEAS/VÓMITOS | ¿Ha tenido? ¿Cómo lo describiría?  Cuando, como mejoran o empeoran, cuanto duraron… |  |  |
| SOMNOLENCIA/HIPERSOMNIA? | ¿Ha tenido? ¿Cómo lo describiría?  ¿Ha notado si duerme más durante el día? |  |  |
| ALTERACIONS DE LA SON | ¿Ha tenido? ¿Cómo lo describiría?  ¿le cuesta dormir? ¿a qué lo atribuye? |  |  |
| ESCALOFRÍOS | ¿Ha tenido? ¿Cómo lo describiría?  ¿Cuándo? ¿Ha notado si han tenido relación con la fiebre? |  |  |
| MAREOS | ¿Ha tenido? ¿Cómo lo describiría?  ¿Cuándo los presentaba?  ¿Se parecían a otros que haya experimentado alguna vez?  ¿Cuántos días han durado? |  |  |
| MALESTAR GENERAL | ¿Ha tenido? ¿Cómo lo describiría?  ¿A qué le recuerda?  ¿Cuántos días han durado? |  |  |
| DOLOR MUSCULAR | ¿Ha tenido? ¿Cómo lo describiría?  ¿A qué sensación que haya tenido antes le recuerda?  ¿Todo el día? ¿Cuándo empeoraba, con qué mejoraba? ¿Cuántos días ha durado? |  |  |
| INAPETENCIA | ¿Ha tenido? ¿Cómo la describiría?  ¿Se ha saltado alguna comida? |  |  |
| EXPECTORACIÓN | ¿Ha tenido? ¿Cómo la describiría?  ¿Cuándo apareció? ¿Cuántos días ha durado? |  |  |
| DOLOR DE GARGANTA | ¿Ha tenido? ¿Cómo lo describiría?  ¿Cuántos días ha durado? Con qué mejora, con qué empeora, ¿todo el día? Valorar intensidad |  |  |
| RINORREA | ¿Ha tenido? ¿Cómo la describiría?  ¿Cuándo apareció? ¿Cuántos días duró? |  |  |
| CONGESTIÓN NASAL | ¿Ha tenido? ¿Cómo la describiría?  ¿Le recuerda a otros episodios?  ¿Cuándo apareció? ¿Cuándo desapareció? ¿Apareció de golpe o progresivamente? |  |  |
| MANIFESTACIONES CUTÀNEAS | ¿Ha tenido? ¿Cómo las describiría? |  |  |
| PROBLEMAS OCULARES | ¿Ha tenido? ¿Cómo lo describiría?  ¿le pican los ojos? ¿Tiene que parpadear más que habitualmente? |  |  |
| HEMOPTISIS | ¿Ha tenido? ¿Cómo lo describiría? ¿Cuándo apareció? ¿todas las veces que tosía o sólo algunas? ¿cuántas veces lo vió? ¿Gotas con el moco, hilillos de sangre con el moco, moco rosado…? |  |  |
| MISCELANEA: dolor abdominal, sudoración, pies fríos, pérdida  de peso, síntomas  ginecológicos o en relación con el  ciclo menstrual,  Añadir en este apartado si el o la paciente relata su estado emocional durante el proceso | ¿Ha tenido? ¿Cómo lo describiría?  ¿Le ha llamado la atención algo en relación con la temperatura de su cuerpo? Descríbalo minuciosamente  ¿Ha tenido dolor en la barriga? Cuando, como era, descríbalo minuciosamente. ¿Con que mejora o empeora?  ¿Ha percibido cambios en la menstruación durante el tiempo que han durado los síntomas? |  |  |

1. [↑](#endnote-ref-1)
