# Supplementary material
Source: Elsevier journal article supplement (https://www.sciencedirect.com/science/article/pii/S0213911122000012)
Supplement: mmc3 [file S0213911122000012:mmc3.docx]

ANEXO 3. Guía narrativa de los profesionales.

(Escrito máximo de 2 hojas din A4)

- Describe que tipo de pacientes has visto con COVID19 confirmado o posibles COVID19
- Características de los pacientes
- ¿Cuál era su situación, su aspecto, su estado general?
- ¿Qué síntomas tenían? Descríbelos minuciosamente. Intenta describir su patrón temporal. ¿Qué evolución has observado?
- ¿Los has explorado o no? Qué motivo te ha hecho explorarlos. Qué motivo te ha hecho no explorarlos. ¿Qué has visto en la exploración?
- ¿Cómo lo vivían? ¿Cómo eran su sufrimiento y sus síntomas psicológicos?
- ¿Cómo los clasificarías? ¿Podrías diferenciar entre leves y moderados? ¿Qué te hace incluirlos en una categoría o en otra? ¿Qué incluirías en una categoría y en otra?
